# Supplementary material for: Selective Recovery of Palladium (II) from Metallurgical Wastewater Using Thiadiazole-Based Chloromethyl Polystyrene-Modified Adsorbent
Source: MDPI journal article supplement (doi:10.3390/ijms232012158), 2022-10-12
Supplement: s1 [file s1]

## Supplementary Materials for

# Selective Recovery of Palladium (II) from Metallurgical Wastewater Using Thiadiazole-based Chloromethyl Polystyrene-modified Adsorbent

**Table S1.** The synthetic pathway of 2, 5-bis-polystyrene-1,3,4-thiadiazole (PS-DMTD) and 2,5-bis(benzylthio)-1,3,4-thiadiazole (DTTD).

| Structure                                                                                             | Synthetic scheme                                                                     |
|-------------------------------------------------------------------------------------------------------|--------------------------------------------------------------------------------------|
| 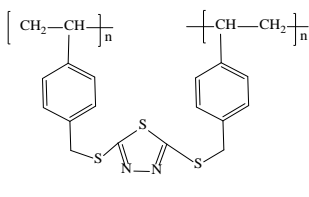<br><b>PS-DMTD</b> |  |
| <br><b>DTTD</b>    |  |

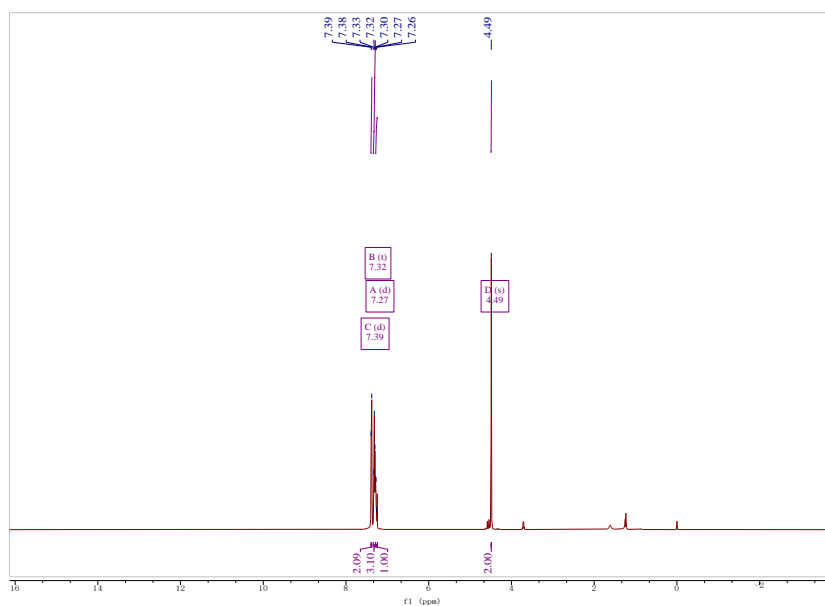

**Figure S1.**  $^1\text{H}$  NMR spectrum of **DTTD**.

$^1\text{H}$  NMR (500 MHz, Chloroform-d)  $\delta$  7.39 (d,  $J$  = 7.5 Hz, 4H), 7.32 (t,  $J$  = 7.2 Hz, 4H), 7.27 (d,  $J$  = 7.2 Hz, 2H), 4.49 (s, 4H).

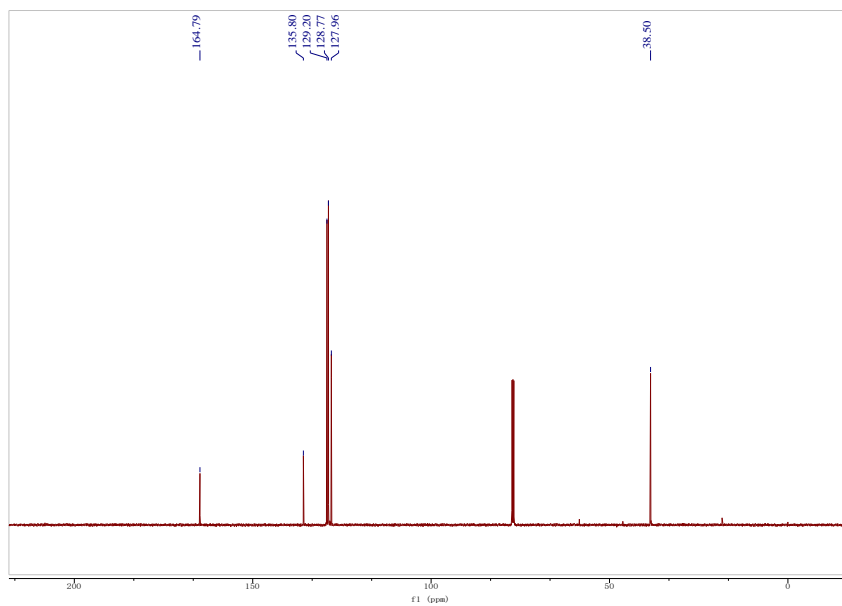

**Figure S2.**  $^{13}\text{C}$  NMR spectrum of **DTTD**.

$^{13}\text{C}$  NMR (125 MHz, Chloroform-d)  $\delta$  164.79, 135.80, 129.20, 128.77, 127.96, 38.50.

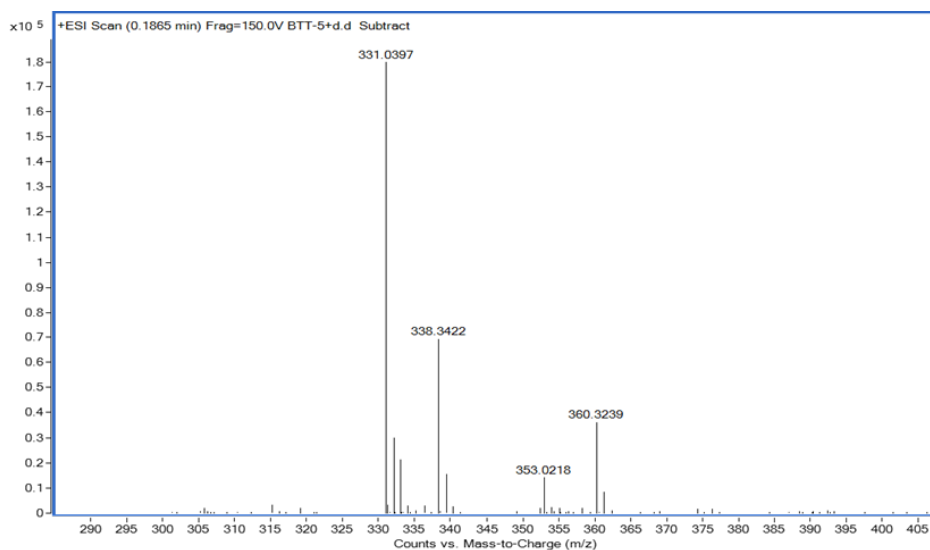

**Figure S3.** HPLC-MS spectrum of **DTTD** (ESI scan).  
**HRMS(ESI)m/s:** found: 331.0397 ( $M+H^+$ ); calc: 331.0392 ( $M+H^+$ ).

**Table S2.** Elemental analysis for PS-Cl and PS-DMTD.

|         | Elemental analysis |       |       |
|---------|--------------------|-------|-------|
|         | N (%)              | C (%) | H (%) |
| PS-Cl   | 0.458              | 81.45 | 7.825 |
| PS-DMTD | 2.536              | 77.56 | 7.22  |

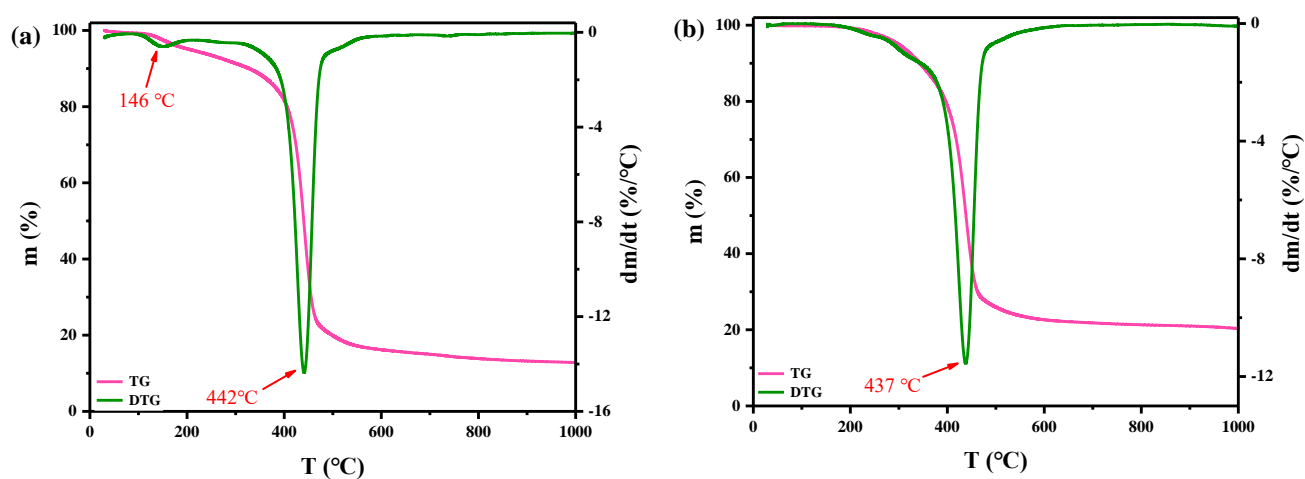

**Figure S4.** TGA curves of PS-Cl (a), and PS-DMTD (b).

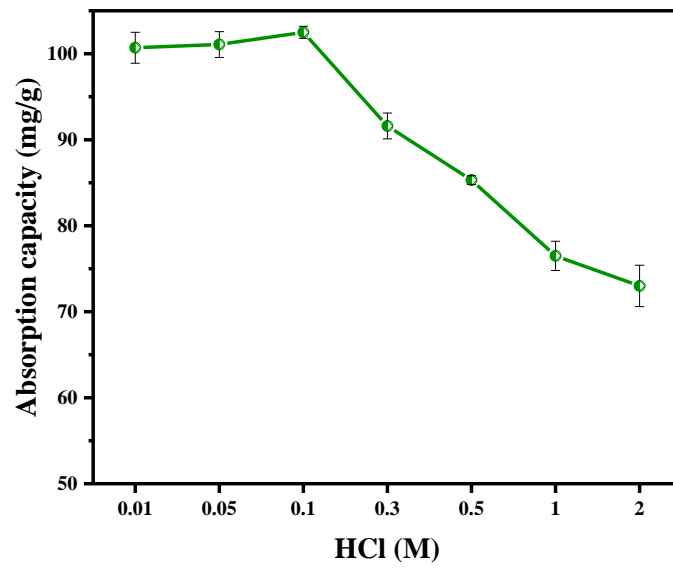

**Figure S5.** Influence of the concentration of HCl in solution.

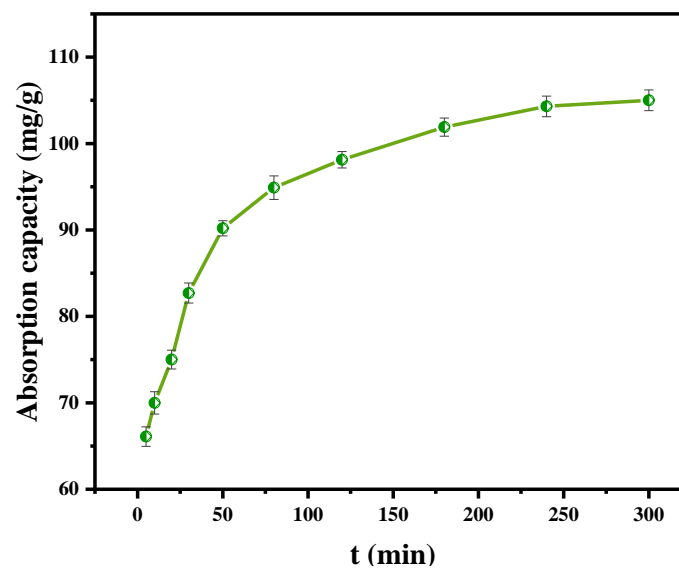

**Figure S6.** Influence of contact time on adsorption of Pd (II).

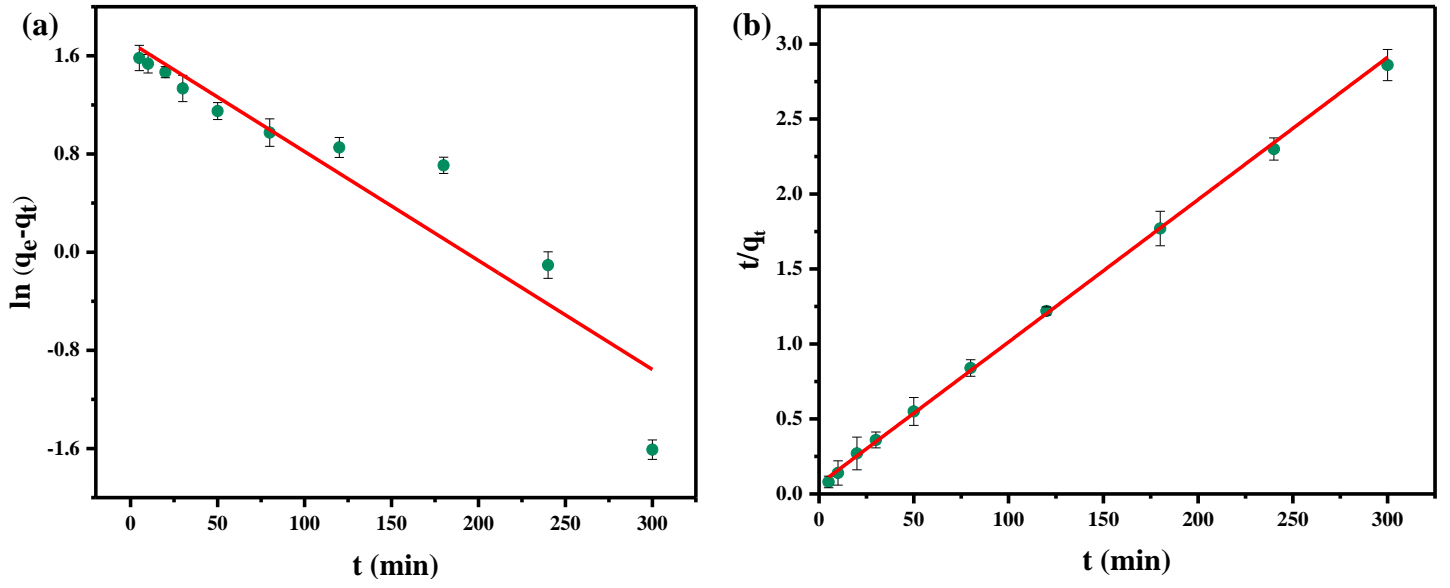

**Figure S7.** Pseudo-first-order kinetic model fitting curve (a); and pseudo-second-order kinetic model fitting curve (b) of PS-DMTD.

$$R_{adj}^2 = 1 - (1 - R^2) \cdot \left( \frac{n-1}{n-p-1} \right) \quad (S1)$$

$$RSS = \sum_i^n (q_{i,exp} - q_{i,model})^2 \quad (S2)$$

$$BIC = n \ln \left( \frac{RSS}{n} \right) + p \ln(n) \quad (S3)$$

where  $n$  is the number of experiments;  $p$  is the number of parameters in the fitting model;  $q_{i,model}$  is individual theoretical  $q$  value predicted by the model; and  $q_{i,exp}$  is individual experimental  $q$  value.

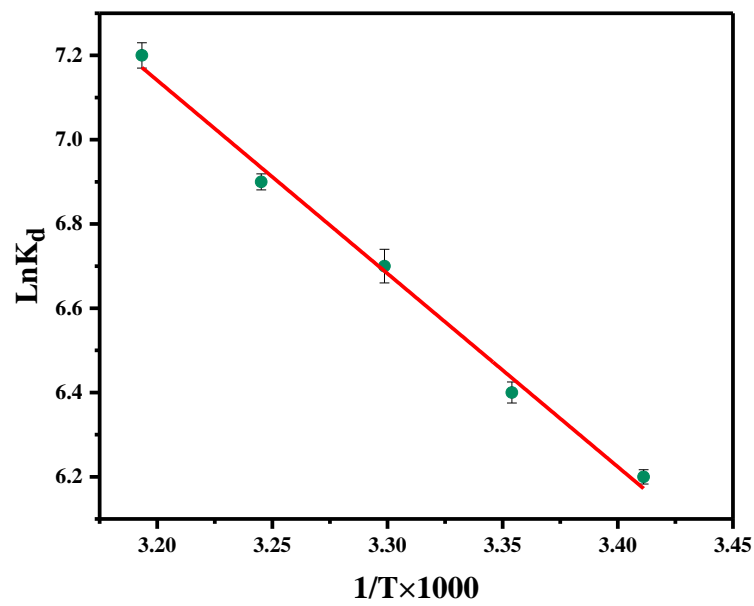

**Figure S8.** The relationship between  $\ln K_d$  and  $1/T$ .

**Table S3.** The composition of the metallurgical wastewater.

| <b>Metal ions</b> | <b>The initial concentration (mg/L)</b> |
|-------------------|-----------------------------------------|
| Pd (II)           | 109.0                                   |
| Pt (IV)           | 52.8                                    |
| Rh (III)          | 42.6                                    |
| Ca <sup>2+</sup>  | 20.3                                    |
| Cu <sup>2+</sup>  | 390.0                                   |
| Fe <sup>3+</sup>  | 5921.7                                  |
| Ni <sup>2+</sup>  | 685.4                                   |
| Pb <sup>2+</sup>  | 19.0                                    |
| V <sup>3+</sup>   | 7.2                                     |
| Ti <sup>4+</sup>  | 13.7                                    |

**Table S4.** The crystal data of **Pd (II)-DTTD<sub>2</sub>Cl<sub>2</sub>**.

| Parameters                        | Data                                                                             |
|-----------------------------------|----------------------------------------------------------------------------------|
| Empirical formula                 | C <sub>32</sub> H <sub>28</sub> N <sub>4</sub> S <sub>6</sub> Cl <sub>2</sub> Pd |
| Formula weight                    | 838.24                                                                           |
| Temperature                       | 298.15 K                                                                         |
| Crystal system                    | Triclinic                                                                        |
| Space group                       | $P\bar{1}$                                                                       |
| Unit cell dimensions              | $a = 8.4697 (3) \text{ \AA}$ $\alpha = 116.290 (1)^\circ$                        |
|                                   | $b = 10.3993 (4) \text{ \AA}$ $\beta = 100.510 (1)^\circ$                        |
|                                   | $c = 11.2654 (4) \text{ \AA}$ $\gamma = 91.792 (1)^\circ$                        |
| Volume                            | 867.59 (6) $\text{\AA}^3$                                                        |
| Z                                 | 1                                                                                |
| Calculated density                | 1.604 mg/m <sup>3</sup>                                                          |
| $\mu/\text{mm}^{-1}$              | 9.35 mm <sup>-1</sup>                                                            |
| F (000)                           | 424                                                                              |
| Crystal size                      | 0.08 × 0.06 × 0.05 mm                                                            |
| Theta range for data collection   | 8.972 to 133.716°                                                                |
| Limiting indices                  | -10 ≤ h ≤ 10, -12 ≤ k ≤ 12, -13 ≤ l                                              |
|                                   | ≤ 13                                                                             |
| Reflections collected             | 22890                                                                            |
| Data/restraints/parameters        | 3075/0/205                                                                       |
| Goodness-of-fit on F <sup>2</sup> | 1.027                                                                            |
| Final R indices [I > 2σ(I)]       | R <sub>1</sub> = 0.0242, wR <sub>2</sub> = 0.0660                                |
| R indices (all data)              | R <sub>1</sub> = 0.0251, wR <sub>2</sub> = 0.0669                                |
| Largest diff. peak and hole       | 0.61 and -0.39 e $\text{\AA}^{-3}$                                               |
